# Supplementary material
Source: MDPI journal article supplement (https://www.mdpi.com/2218-1997/5/5/109)
Supplement: s1 [file s1]

# Quantum Optimal Control of Rovibrational Excitations of a Diatomic Alkali Halide: One-Photon vs. Two-Photon Processes

Yuzuru Kurosaki <sup>1,\*</sup> and Keiichi Yokoyama <sup>2</sup>

<sup>1</sup> Tokai Quantum Beam Science Center, Takasaki Advanced Radiation Research Institute, National Institutes for Quantum and Radiological Science and Technology, Tokai, Ibaraki 319-1195, Japan

<sup>2</sup> Materials Science Research Center, Japan Atomic Energy Agency, Kouto, Sayo, Hyogo 679-5148, Japan; yokoyama.keiichi@jaea.go.jp

\* Correspondence: kurosaki.yuzuru@qst.go.jp

Received: 29 March 2019; Accepted: 3 May 2019; Published: date

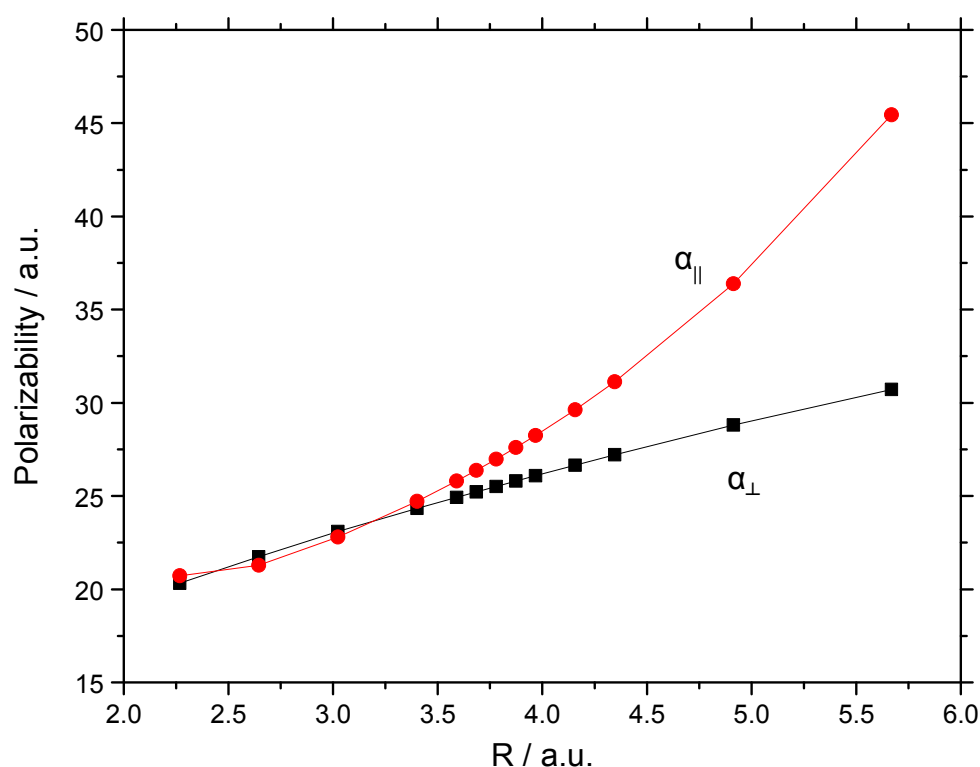

**Figure 1.** Components of polarizability of LiCl parallel ( $\alpha_{||}$ ) and perpendicular ( $\alpha_{\perp}$ ) to the molecular axis, calculated at the RMP2/aug-cc-pVTZ level of theory.

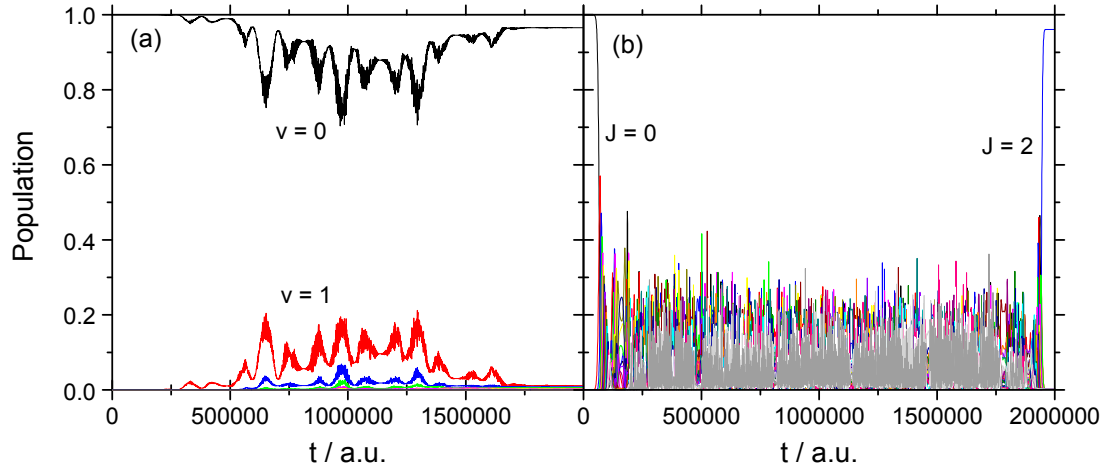

**Figure 2.** Temporal changes in state populations for the rotational excitation,  $(v=0, J=0) \rightarrow (v=0, J=2)$ , caused by the optimal field shown in Figure 5, in the strong-field regime: (a) vibrational states; (b) rotational states.

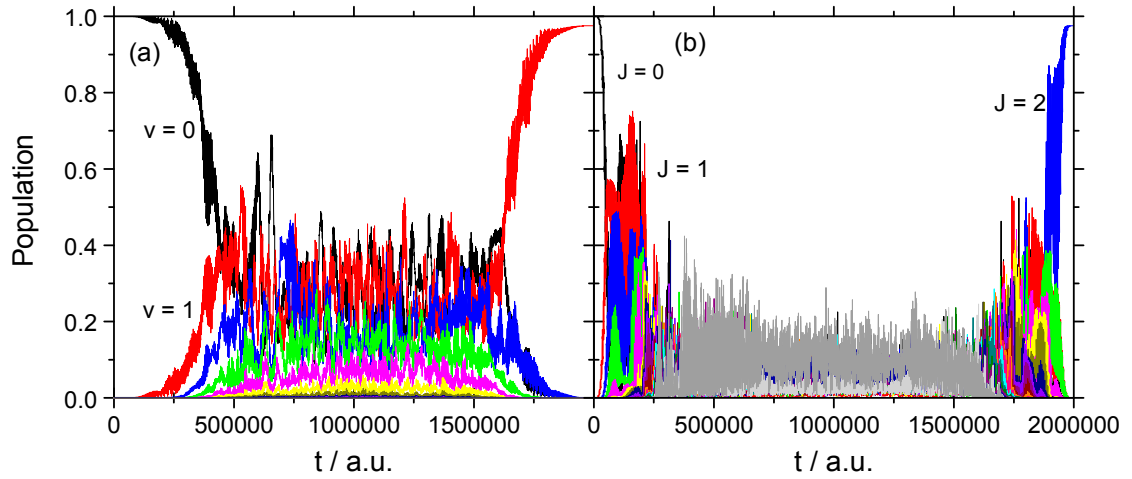

**Figure S3.** Temporal changes in state populations for the vibrational-rotational excitation,  $(v=0, J=0) \rightarrow (v=1, J=2)$ , caused by the optimal field shown in Figure 10, in the strong-field regime: (a) vibrational states; (b) rotational states.
